# Supplementary material
Source: Springer Nature journal article supplement (https://www.springermedizin.de/resource/supplementary/12885_2011_2875_MOESM2_ESM.pdf/9462204)

NK1 WT1 NK2 WT2 NK3 WT3

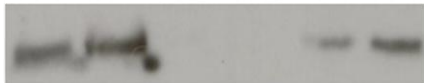

120kDa

HIF-1 $\alpha$

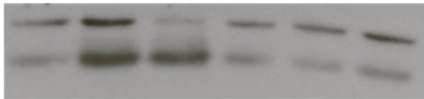

58kDa

54kDa

CAIX

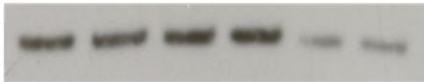

38kDa

GAPDH

Supplement: MOESM2 [file 9462204]
